# Supplementary figures and images for: Phenotypic and Genomic Analysis of Cystic Hygroma in Pigs
Source: MDPI journal article supplement (doi:10.3390/genes12020207), 2021-01-31

## Supplementary Figure S2

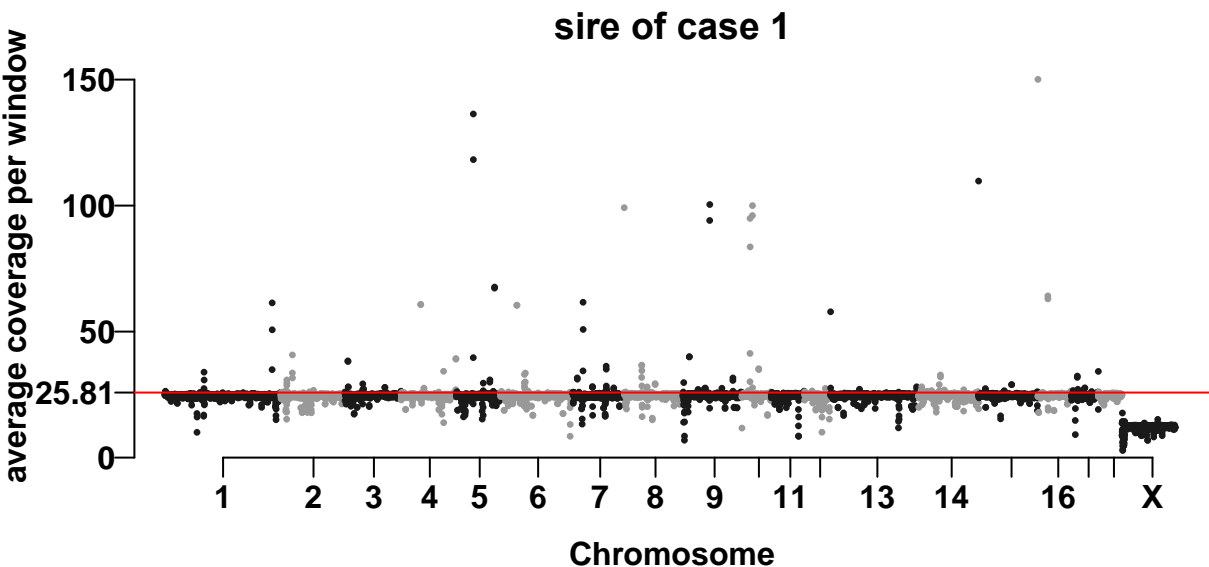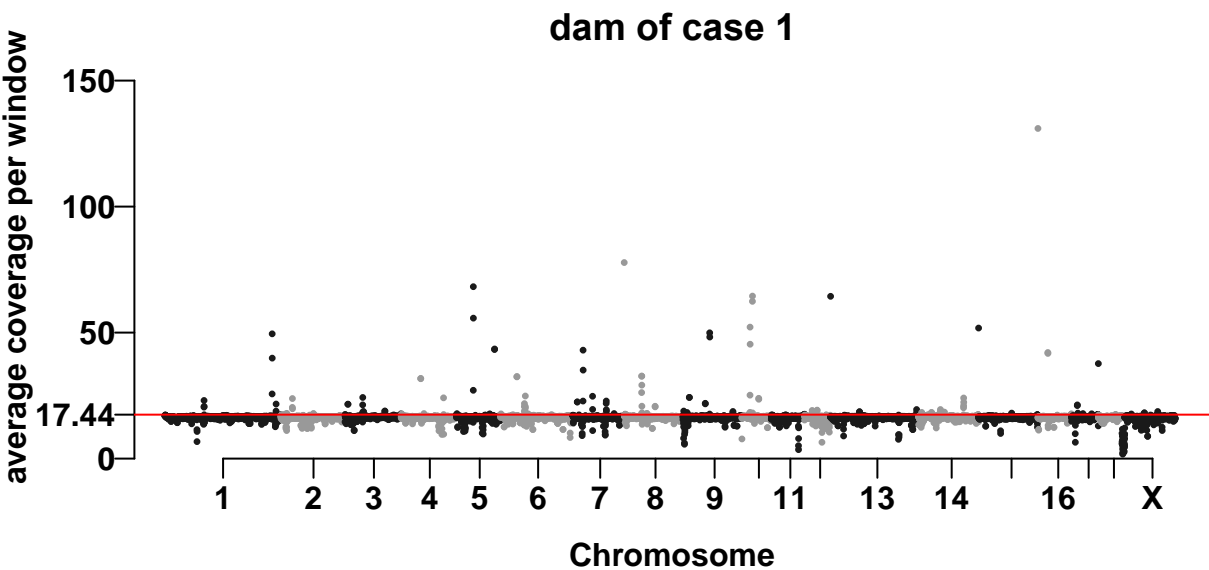

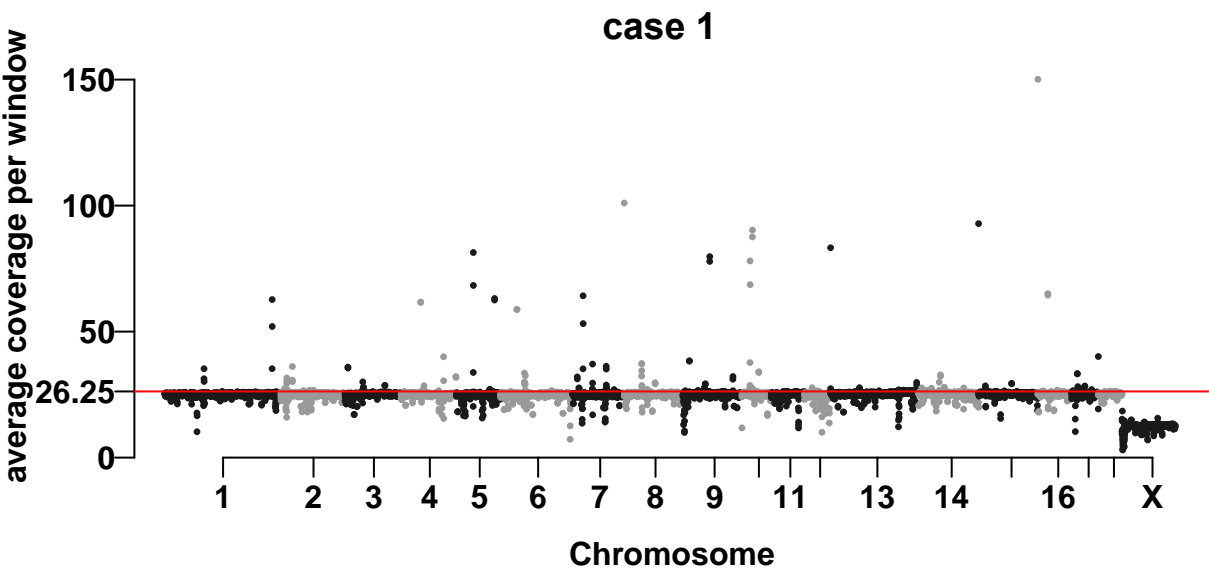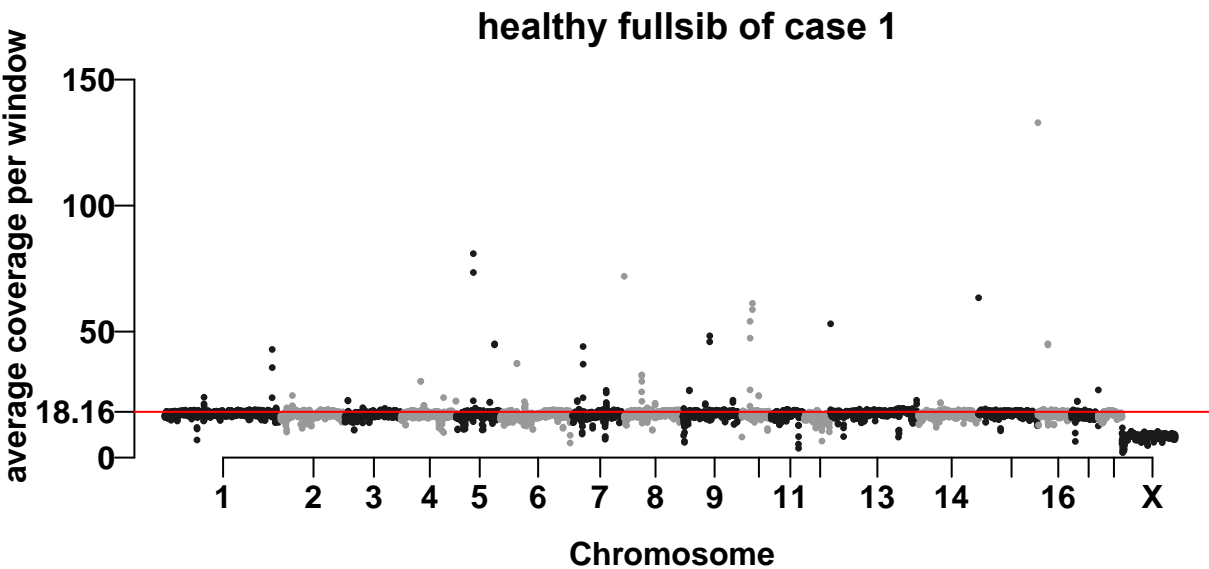

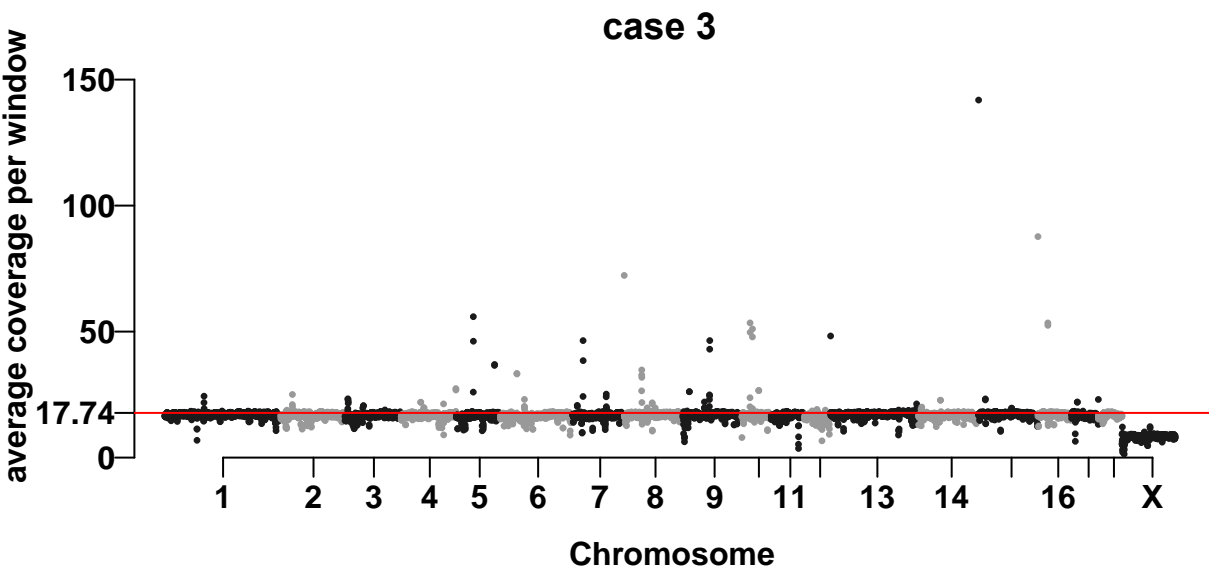

Supplement: s1 [file s1]

Supplementary Figure S1

CHR1

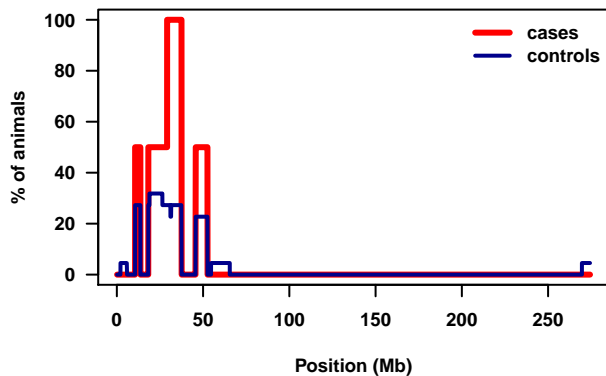

CHR2

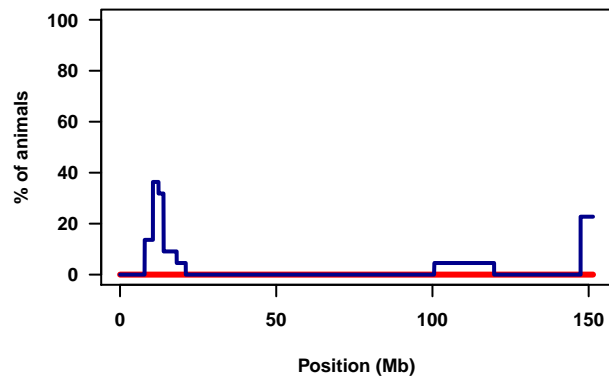

CHR3

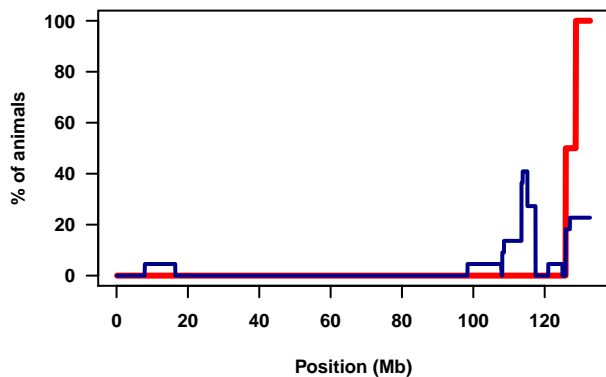

CHR4

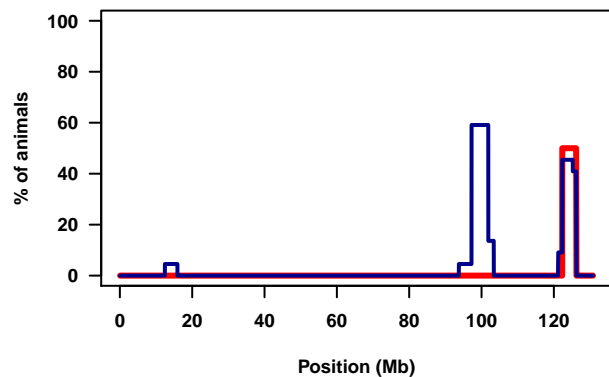

CHR5

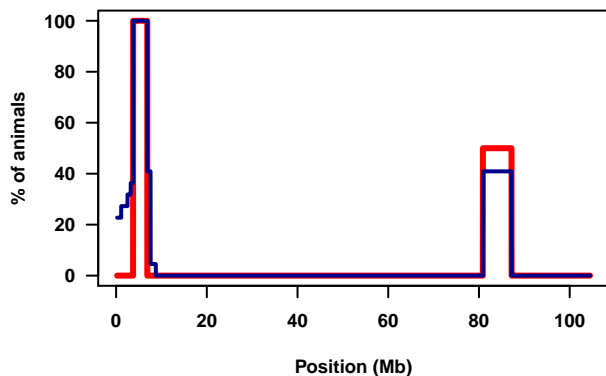

CHR6

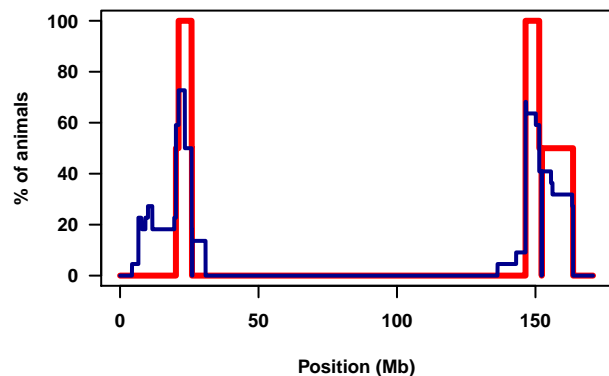

CHR7

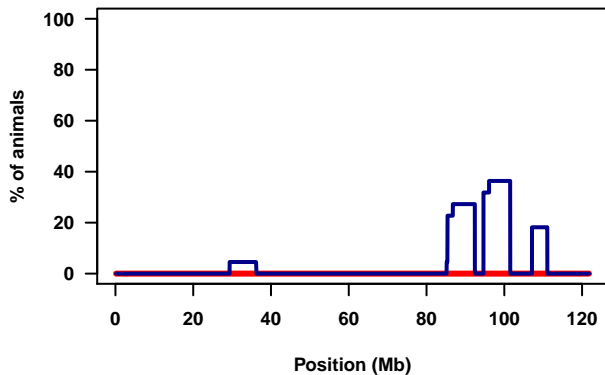

CHR8

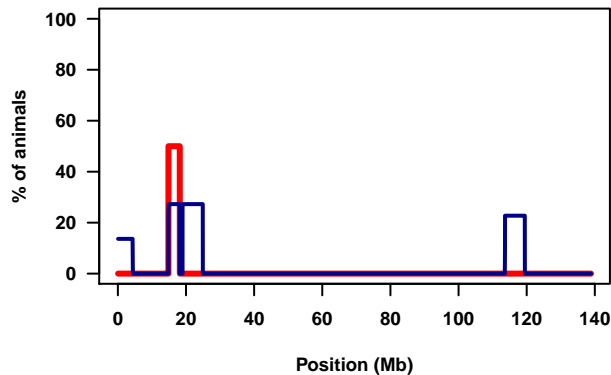

CHR9

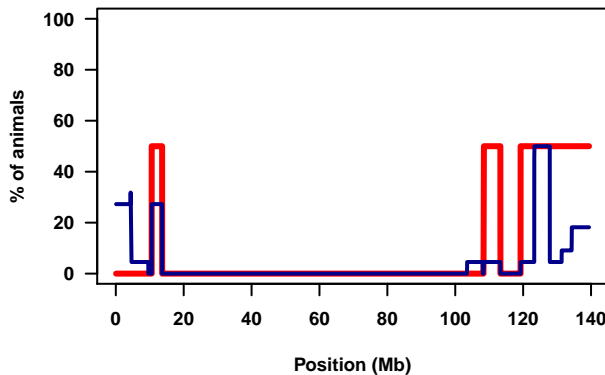

CHR10

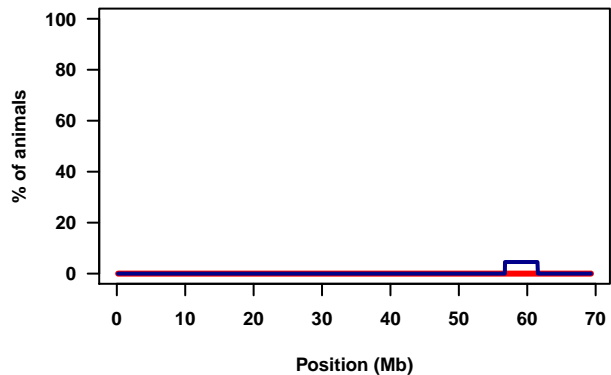

CHR11

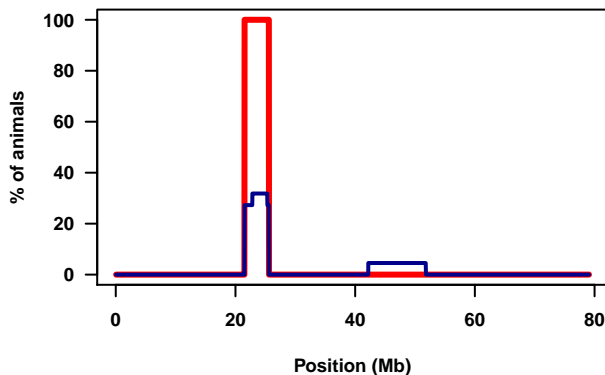

CHR12

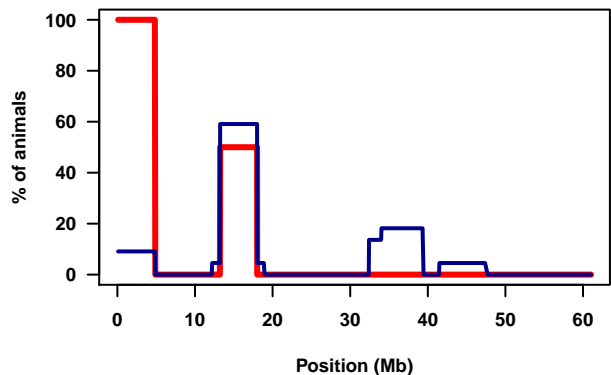

**CHR13**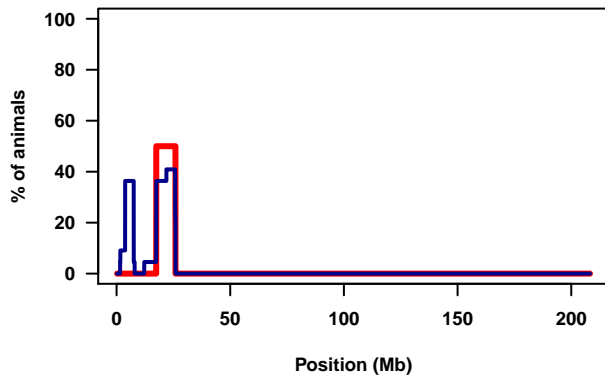**CHR14**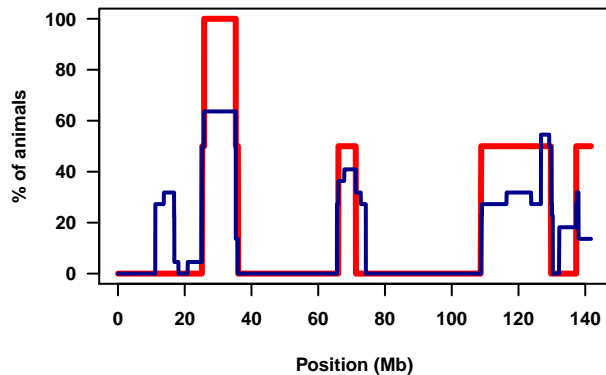**CHR15**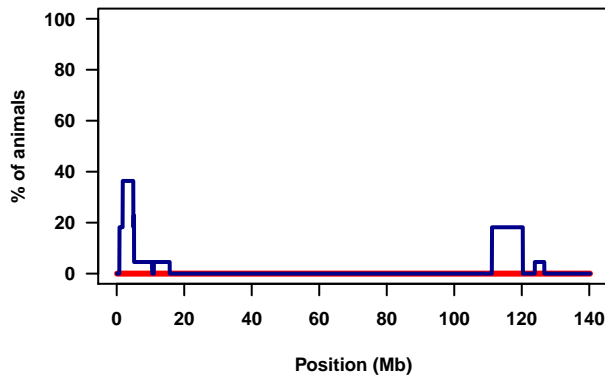**CHR16**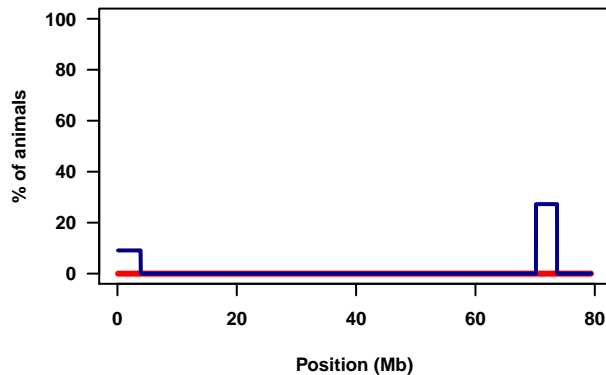**CHR17**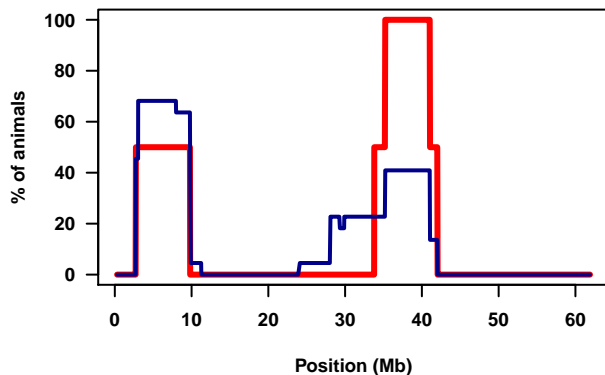**CHR18**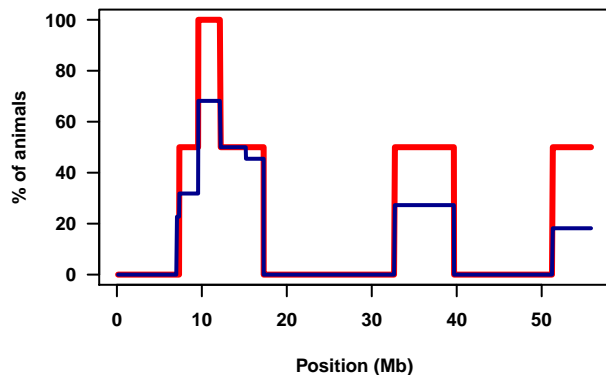

Supplement: s1 [file s1]
